# Supplementary material for: MEF/ELF4 transactivation by E2F1 is inhibited by p53
Source: PubMed Central journal article supplement — Nucleic Acids Res. 2010 Aug 30;39(1):76–88. doi: 10.1093/nar/gkq762 (PMC3017608; doi:10.1093/nar/gkq762), 2010-08-30
Supplement: supp_gkq762_Taura_et_al_Supplemental_Fig.pdf [file supp_gkq762_Taura_et_al_Supplemental_Fig.pdf]

## Supplementary Fig. 1

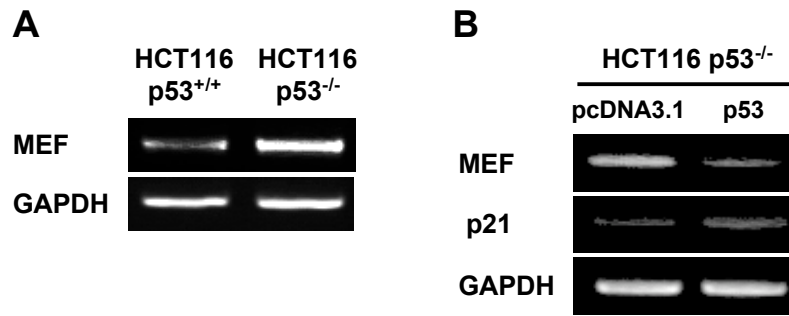

### Supplementary Fig. 1. p53 down-regulates MEF mRNA level.

(A) Total RNA extracted from HCT116 p53<sup>+/+</sup> and p53<sup>-/-</sup> cells were used for analysis of MEF mRNA level. (B) HCT116 p53<sup>-/-</sup> cells were transfected with pcDNA3.1 or p53 plasmid. Forty-eight hr post-transfection, MEF mRNA level was analyzed. For (A, B), conventional PCR was performed using MEF primers. GAPDH served as internal control. MEF primer, forward: 5'-GGAAGACCCCTCTGTGTTCCCAGCTG-3'; and reverse: 5'-CAGTCTTCTTGGCTCTTTCCTCTCTGC-3. Primers for p21 and GAPDH were as shown previously (Taura, M., et al, 2008, *Mol Cell Biol*, **28**, 6557-6567).
